# Supplementary material for: Src-mediated phosphorylation of the ribosome biogenesis factor hYVH1 affects its localization, promoting partitioning to the 60S ribosomal subunit
Source: PubMed Central journal article supplement (PMC9731860; doi:10.1016/j.jbc.2022.102679), 2022-11-10
Supplement: mmc5.pdf [file mmc5.pdf]

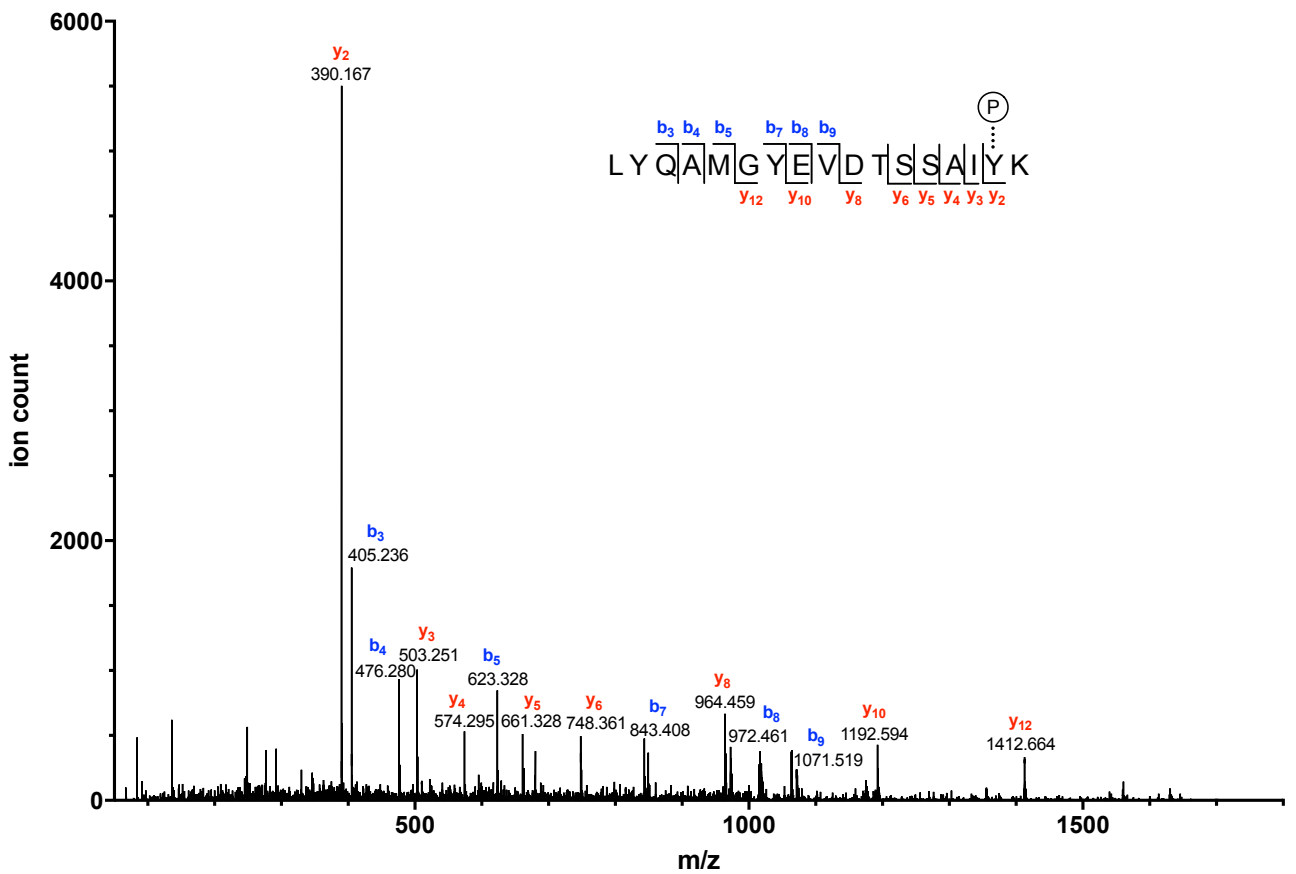

**Figure S2 – Identification of Tyr 179 as a novel hYVH1 phosphorylation site.** HeLa cells expressing FLAG-hYVH1 and myc-Src Y530F were subjected to FLAG immunoprecipitation and trypsin digestion. Mass spectrometry analysis identified a monophosphorylated tryptic peptide at m/z 1017.9<sup>+2</sup> corresponding to amino acids 164-180. MS/MS analysis unambiguously mapped the phosphorylation site to Tyr179.
