# Supplementary material for: Src-mediated phosphorylation of the ribosome biogenesis factor hYVH1 affects its localization, promoting partitioning to the 60S ribosomal subunit
Source: PubMed Central journal article supplement (PMC9731860; doi:10.1016/j.jbc.2022.102679), 2022-11-10
Supplement: mmc6.pdf [file mmc6.pdf]

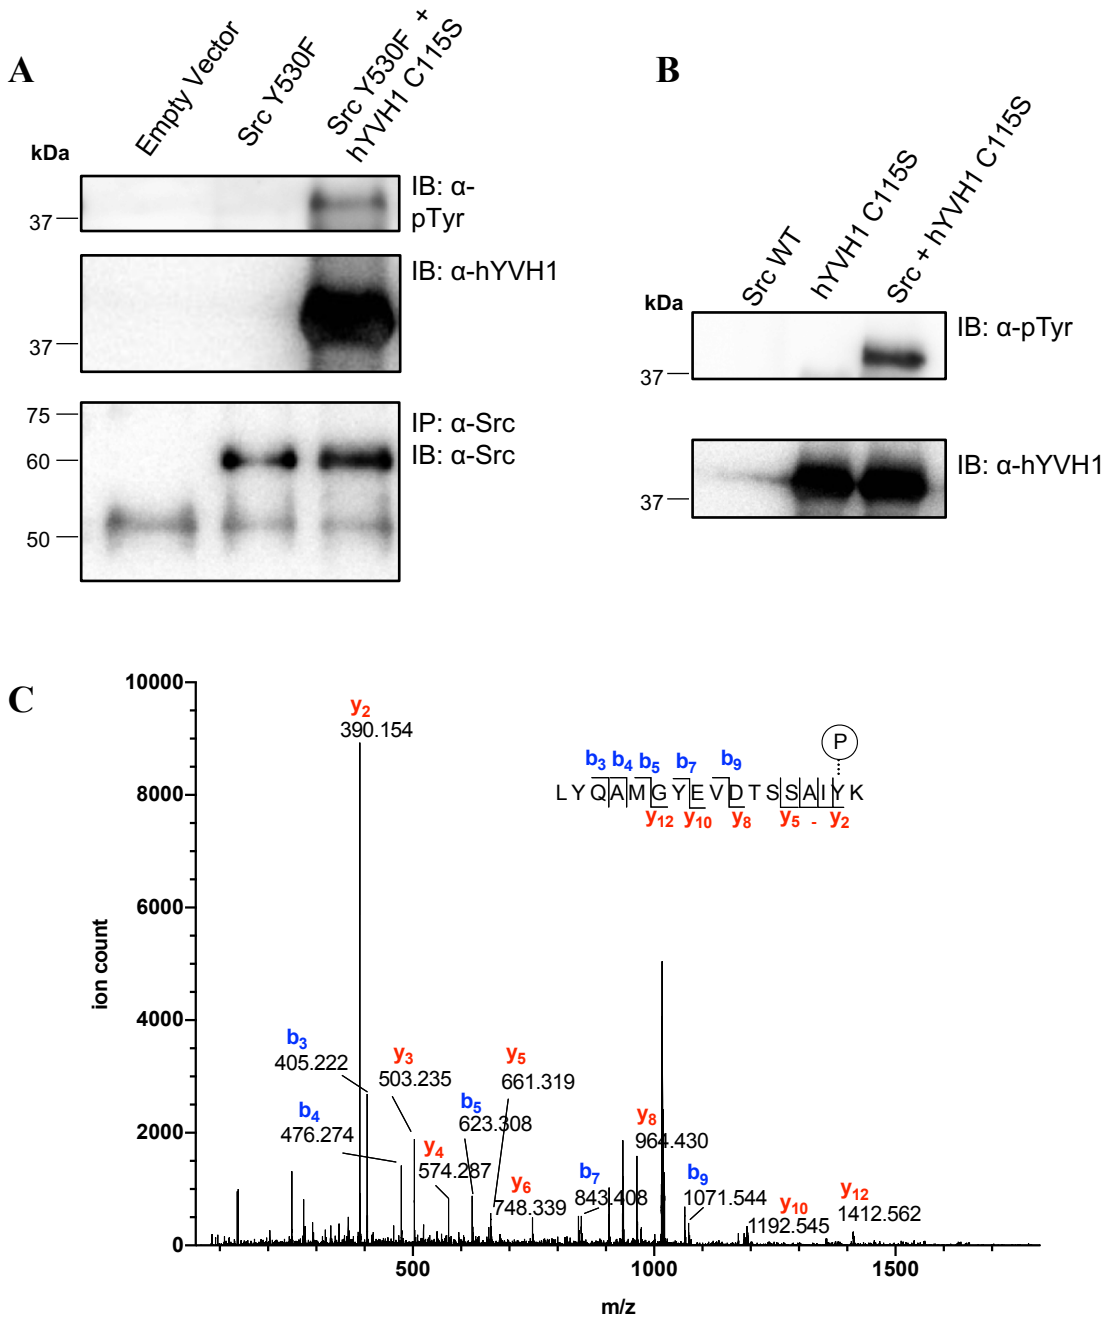

**Figure S3 – Src phosphorylates recombinant hYVH1 *in vitro*.** *A*, HeLa cells expressing myc-Src Y530F were subjected to anti-Src immunoprecipitation and an *in vitro* kinase assay was performed using recombinant hYVH1 C115S purified from *E.coli* cells. Following the *in vitro* kinase assay, samples were analyzed by anti-phosphotyrosine immunoblotting ( $\alpha$ -pTyr). *B*, In vitro kinase assay using recombinant wild type Src and recombinant hYVH1 C115S. Following the kinase assay phosphorylation of hYVH1 was analyzed by anti-phosphotyrosine immunoblotting ( $\alpha$ -pTyr). *C*, Representative MS/MS fragment ion spectrum of a monophosphorylated tryptic peptide at  $m/z$  1017.9<sup>+2</sup> corresponding to amino acids 164-180 of hYVH1. Analysis of the fragmentation pattern unambiguously mapped the phosphorylation site to Tyr179.
